# Supplementary material
Source: publisher figshare collection journal article supplement (https://acs.figshare.com/ndownloader/files/4128943)
Supplement: Supplementary file 1 [file 4128943]

## *Supportive Information*

### **Biodiesel production from sewage sludge: New paradigm for mining energy from municipal hazardous material**

#### **Author:**

Eilhann E. Kwon<sup>1</sup>, Sungpyo Kim<sup>2</sup>, Young Jae Jeon<sup>1</sup>, and Haakrho Yi<sup>1\*</sup>

#### **Affiliation:**

<sup>1</sup>Bio-Energy Research Team, Research Institute of Industrial Science and Technology (RIST), Kwang-Yang-City, South Korea

<sup>2</sup>Department of Environment Systems Engineering, Korea University, Chung-Nam, South Korea

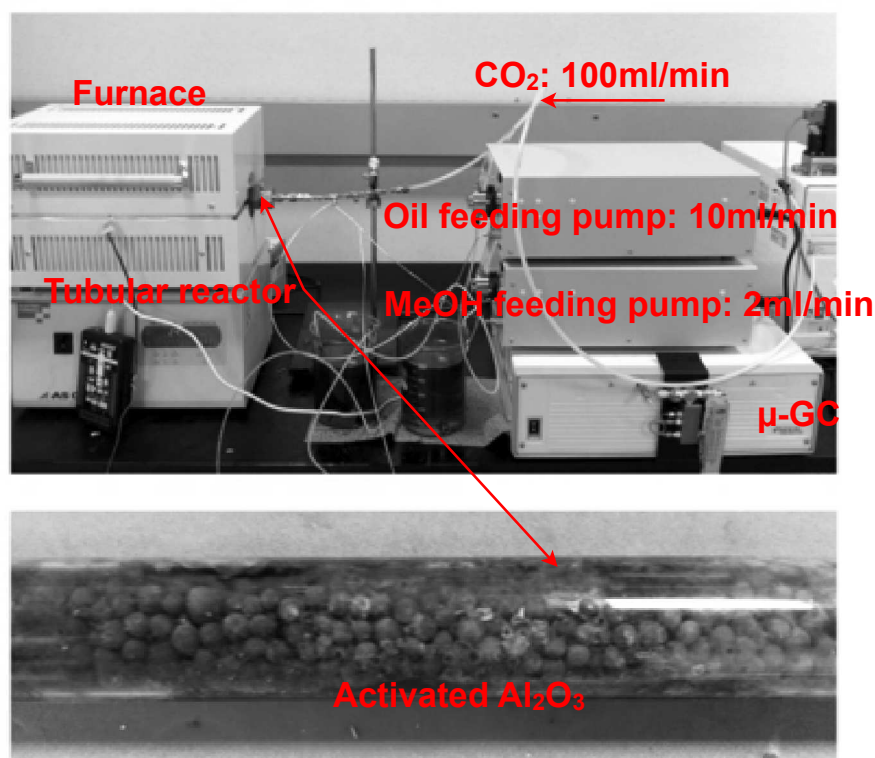

Figure SI-1. Overall illustration of experimental setup and inside of reactor
